# Supplementary material for: A novel cell-based screening assay for small-molecule MYB inhibitors identifies podophyllotoxins teniposide and etoposide as inhibitors of MYB activity
Source: PubMed Central journal article supplement (PMC6120916; doi:10.1038/s41598-018-31620-1), 2018-09-03
Supplement: 41598_2018_31620_MOESM1_ESM.pdf [file 41598_2018_31620_MOESM1_ESM.pdf]

## **Supplementary information**

### **A novel cell-based screening assay for small-molecule MYB inhibitors identifies podophyllotoxins teniposide and etoposide as inhibitors of MYB activity**

Maria Yusenko, Anke Jakobs and Karl-Heinz Klempnauer\*

Institute for Biochemistry, Westfälische-Wilhelms-Universität, D-48149 Münster, Germany

\* Corresponding author: K.-H. Klempnauer, Institute for Biochemistry, Westfälische-Wilhelms-Universität, D-48149 Muenster, Germany. Tel.: +49-251-8333203, Fax: +49-251-8333206, e-mail: klempna@uni-muenster.de

| Supplementary Table 1 |                                                                                                          |       |       |
|-----------------------|----------------------------------------------------------------------------------------------------------|-------|-------|
|                       | Name                                                                                                     | NSC   | % Luc |
| 1                     | Colchicine                                                                                               | 757   | 155   |
| 2                     | (Dimethylamino)ethanol                                                                                   | 2652  | 87    |
| 3                     | Actinomycin D                                                                                            | 3053  |       |
| 4                     | Pomiferin                                                                                                | 5113  | 102   |
| 5                     | Lambdamycin                                                                                              | 5159  | 49    |
| 6                     | Narcotine                                                                                                | 5366  | 108   |
| 7                     | Veratridine                                                                                              | 7524  | 85    |
| 8                     | Aleuritic acid                                                                                           | 7668  | 113   |
| 9                     | Khellin                                                                                                  | 8519  | 103   |
| 10                    | Fumagillol                                                                                               | 9665  | 124   |
| 11                    | Protopine hydrochloride                                                                                  | 11440 | 114   |
| 12                    | Aristolochic acid                                                                                        | 11926 | 117   |
| 13                    | Resorufin                                                                                                | 12097 | 87    |
| 14                    | Chlorotetracycline hydrochloride                                                                         | 13252 | 108   |
| 15                    | Glaucarubin                                                                                              | 14975 | 51    |
| 16                    | Amygdalin                                                                                                | 15780 | 105   |
| 17                    | Pyrethrosin                                                                                              | 22070 | 86    |
| 18                    | Coumestrol                                                                                               | 22842 | 92    |
| 19                    | Himbacine                                                                                                | 23969 | 104   |
| 20                    | Rotenone                                                                                                 | 26258 | 157   |
| 21                    | Cyclophosphamide                                                                                         | 26271 | 124   |
| 22                    | $\beta$ -Lapachone                                                                                       | 26326 | 118   |
| 23                    | Dihydroisorescinnamine                                                                                   | 29854 | 138   |
| 24                    | Mangostin                                                                                                | 30552 | 131   |
| 25                    | Neohesperidin                                                                                            | 31048 | 132   |
| 26                    | Decarboxy norlobaric acid                                                                                | 31867 | 85    |
| 27                    | Bicuculline                                                                                              | 32192 | 182   |
| 28                    | Isocorydine                                                                                              | 32979 | 116   |
| 29                    | Curcumin                                                                                                 | 32982 | 125   |
| 30                    | Solanine hydrochloride                                                                                   | 35611 | 85    |
| 31                    | Canadine                                                                                                 | 36351 | 111   |
| 32                    | (2 <i>R</i> ,3 <i>R</i> ) 2-(3,4-Dihydroxyphenyl)-3,6,7-trihydroxy-2,3-dihydro-4 <i>H</i> -chromen-4-one | 36398 | 133   |
| 33                    | Santonin oxime                                                                                           | 42038 | 162   |
| 34                    | Streptonigrin                                                                                            | 45383 | 9     |
| 35                    | Methoxsalen                                                                                              | 45923 | 103   |
| 36                    | Carbomycin                                                                                               | 51001 | 161   |
| 37                    | Aconitine                                                                                                | 56464 | 164   |
| 38                    | Fumagillin dicyclohexylamine salt                                                                        | 58368 | 125   |
| 39                    | Tylocrebrine                                                                                             | 60387 |       |
| 40                    | Isopropylideneazastreptonigrin                                                                           | 62709 | 99    |
| 41                    | Toyocamycin                                                                                              | 63701 | 7     |
| 42                    | Vincristine sulfate                                                                                      | 67574 | 305   |
| 43                    | Ellipticine                                                                                              | 71795 | 200   |
| 44                    | Pseudoyohimbine                                                                                          | 72116 | 149   |
| 45                    | Thaspine acetate                                                                                         | 76022 |       |
| 46                    | Daunomycin hydrochloride                                                                                 | 82151 |       |
| 47                    | Helenalin                                                                                                | 85236 | 100   |
| 48                    | Parthenicin                                                                                              | 85239 | 238   |
| 49                    | Stictic acid                                                                                             | 87511 | 111   |

|    |                                                                                                                                       |        |     |
|----|---------------------------------------------------------------------------------------------------------------------------------------|--------|-----|
| 50 | Brefeldin A                                                                                                                           | 89671  | 78  |
| 51 | Camptothecin                                                                                                                          | 94600  |     |
| 52 | 7,8-Dimethylalloxazine                                                                                                                | 96911  | 126 |
| 53 | Fungichromin                                                                                                                          | 105388 | 97  |
| 54 | Cucurbitacin E                                                                                                                        | 106399 |     |
| 55 | Ascochitine                                                                                                                           | 114344 | 82  |
| 56 | Radicinin                                                                                                                             | 118343 | 98  |
| 57 | Valinomycin                                                                                                                           | 122023 | 49  |
| 58 | Sporidesmolide I                                                                                                                      | 122224 | 77  |
| 59 | Geldanamycin                                                                                                                          | 122750 | 111 |
| 60 | Teniposide                                                                                                                            | 122819 | 14  |
| 61 | Picrotin                                                                                                                              | 129536 | 90  |
| 62 | Tubulosine                                                                                                                            | 131547 | 100 |
| 63 | Rifamycin sodium salt                                                                                                                 | 133100 | 95  |
| 64 | Lankacidin C                                                                                                                          | 145118 | 100 |
| 65 | Nystatin                                                                                                                              | 150817 | 96  |
| 66 | Maytansine                                                                                                                            | 153858 | 161 |
| 67 | Parthenolide                                                                                                                          | 157035 | 61  |
| 68 | Streptoal C                                                                                                                           | 169627 | 82  |
| 69 | Fastigillin B                                                                                                                         | 176503 | 27  |
| 70 | Lasalocid                                                                                                                             | 177406 | 75  |
| 71 | Virginiamycin S1                                                                                                                      | 177858 | 122 |
| 72 | (7E)-2-Acetyl-2,3,4,5-tetrahydrooxonine-6,9-dione                                                                                     | 180515 | 93  |
| 73 | 4-(4,5-Dihydroxy-4,6-dimethyloxan-2-yl)oxy-14-ethyl- 6,7,12-trihydroxy-3,5,7,9,11,13-hexamethyl- oxacyclotetradecane-2,10-dione       | 209870 | 77  |
| 74 | Crassin                                                                                                                               | 210236 | 18  |
| 75 | Wortmannin                                                                                                                            | 221019 | 103 |
| 76 | Rapamycin                                                                                                                             | 226080 | 103 |
| 77 | Dodecahydro-8"-hydroxy-1",6"-dimethyldispiro-[furan- 3(2H),2'(5'H)-furan-5',5"-[5H-1,4a](methan- oxymethano)naphthalen]-2,9"-dione    | 250429 | 77  |
| 78 | (7aR,12aR) 13-Methoxy-3,3-dimethyl-11-(3-methyl-2- buten-1-yl)-7a,12a-dihydro-3H,7H-benzofuro[3,2- c]pyrano[3,2-g][1]benzopyran-10-ol | 250430 | 116 |
| 79 | 17-Amino-17-demethoxygeldanamycin                                                                                                     | 255109 | 97  |
| 80 | Erythro-9-(2-Hydroxy-3-nonyl)adenine hydrochloride                                                                                    | 263164 | 88  |
| 81 | Nanaomycin A                                                                                                                          | 267461 | 20  |
| 82 | Dehydrocyclobutatusin                                                                                                                 | 270914 | 86  |
| 83 | Batyl alcohol                                                                                                                         | 284200 | 51  |
| 84 | (3aR,5aβ,6S,8aS,8bS)-Octahydro-10,10-dimethyl- 6,8b-Ethano-8bH-cyclopenta[de]-2-benzopyran-1,4- dione                                 | 284437 | 55  |
| 85 | Siomycin A                                                                                                                            | 285116 | 121 |
| 86 | Physalin B                                                                                                                            | 287088 | 81  |
| 87 | Nigericin sodium salt                                                                                                                 | 292567 | 13  |
| 88 | Daphnetin diacetate                                                                                                                   | 301683 | 63  |
| 89 | BOHLMANN K2631                                                                                                                        | 302289 | 110 |
| 90 | Cytochalasin H                                                                                                                        | 305222 | 56  |
| 91 | Lonchocarpic acid                                                                                                                     | 307981 | 54  |
| 92 | Bactobolin                                                                                                                            | 325014 | 37  |
| 93 | Didemnin B                                                                                                                            | 325319 |     |
| 94 | Baccatin III                                                                                                                          | 330753 | 60  |
| 95 | Rhizoxin                                                                                                                              | 332598 | 528 |
| 96 | Hispanolone                                                                                                                           | 332876 | 78  |
| 97 | Tetrocarcin A sodium salt                                                                                                             | 333856 | 2   |

|     |                                                                                                                                                  |        |     |
|-----|--------------------------------------------------------------------------------------------------------------------------------------------------|--------|-----|
| 98  | Triptolide analog                                                                                                                                | 337783 | 54  |
| 99  | 12- <i>O</i> -Palmitoyl-16-hydroxyphorbol-13-acetate                                                                                             | 338250 | 643 |
| 100 | Bryostatin 1                                                                                                                                     | 339555 | 144 |
| 101 | Chaetochromin A                                                                                                                                  | 345647 | 24  |
| 102 | 4- <i>Ipomeanol</i>                                                                                                                              | 349438 | 68  |
| 103 | Medicarpin                                                                                                                                       | 350085 | 46  |
| 104 | Sesquiterpene lactone 326                                                                                                                        | 361902 | 45  |
| 105 | Artemisinin                                                                                                                                      | 369397 | 34  |
| 106 | Confertifoline                                                                                                                                   | 375294 | 81  |
| 107 | Nordracorubin                                                                                                                                    | 376248 | 81  |
| 108 | Benzyl 4'- <i>(1,3-dioxoisindol-2-yl)</i> -2,2-dimethyl-1,5'-dioxospiro[3 <i>aH</i> -imidazo[1,2- <i>a</i> ]-indole-4,2'-oxolane]-3- carboxylate | 382796 | 54  |
| 109 | Illudin M                                                                                                                                        | 400978 | 12  |
| 110 | Pleurotin                                                                                                                                        | 401005 | 55  |
| 111 | Ellagic acid                                                                                                                                     | 407286 | 50  |
| 112 | Corynanthine                                                                                                                                     | 407306 | 43  |
| 113 | Echinomycin                                                                                                                                      | 526417 |     |
| 114 | <i>(1S,7R,8aR)</i> -1,2,3,5,6,7,8,8 <i>a</i> -Octahydro-indolizine- 1,6,7,8-tetrol                                                               | 614552 | 61  |
| 115 | Pentoxifyllin                                                                                                                                    | 637086 | 52  |
| 116 | Michellamine B diacetic acid salt                                                                                                                | 661755 | 46  |
| 117 | Fumitremorgin C                                                                                                                                  | 719655 | 53  |

**Supplementary Table 1.** Compounds in the Natural product set III and luciferase activities (percent of untreated cells) after over-night treatment of Hek-Myb-Luc cells at 5  $\mu$ M concentration. Luciferase values represent the average of two independent measurements. Missing luciferase values refer to cells that appeared dead upon microscopic inspection.

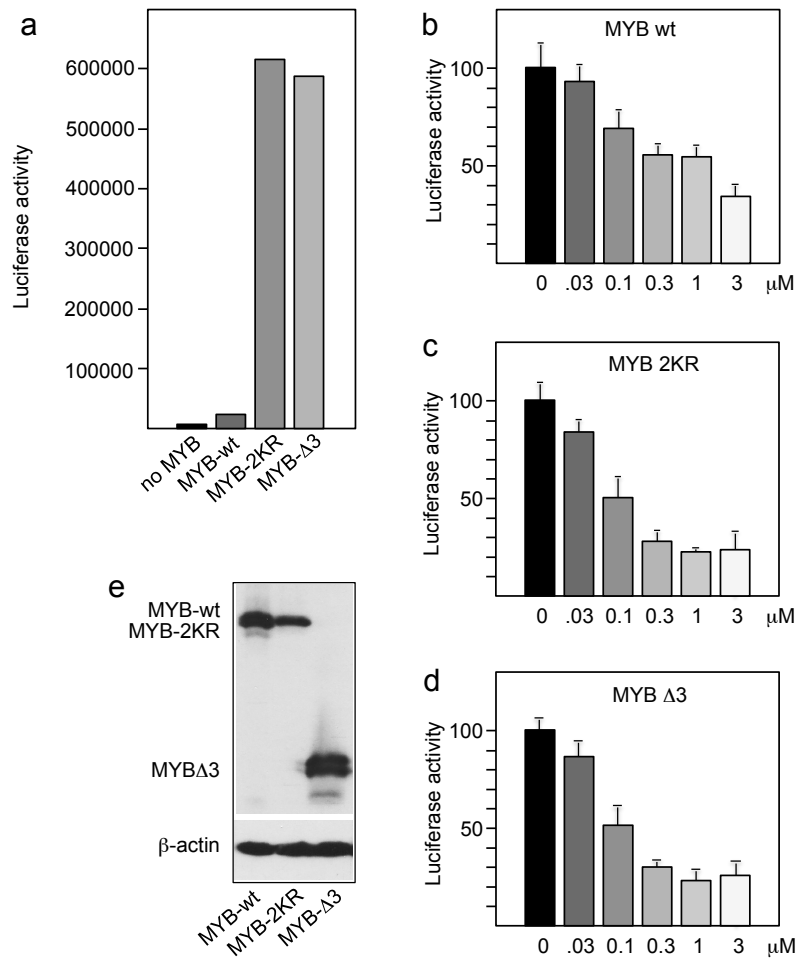

**Supplementary Fig.1.** Inhibition of wt and mutant Myb by teniposide. Hek293 cells were transiently transfected with the luciferase reporter gene pGL4-5xMRE(GG)-Myc and expression vectors for MYB-wt (b), MYB-2KR (c) or MYB-Δ3 (d). After transfection the cells were pipetted off the plate and equal amounts were replated in a microtiter plate, with 4 replicate wells for each MYB construct and each concentration of teniposide. The cells were incubated over night followed by measuring the luciferase activity. Panel a shows a comparison of the absolute luciferase activities in the absence of teniposide. Panels b to d show the relative luciferase activities in the presence of the indicated concentrations of teniposide. Panel e shows a western blot analysis of the transfected cells using antibodies against MYB and β-actin.

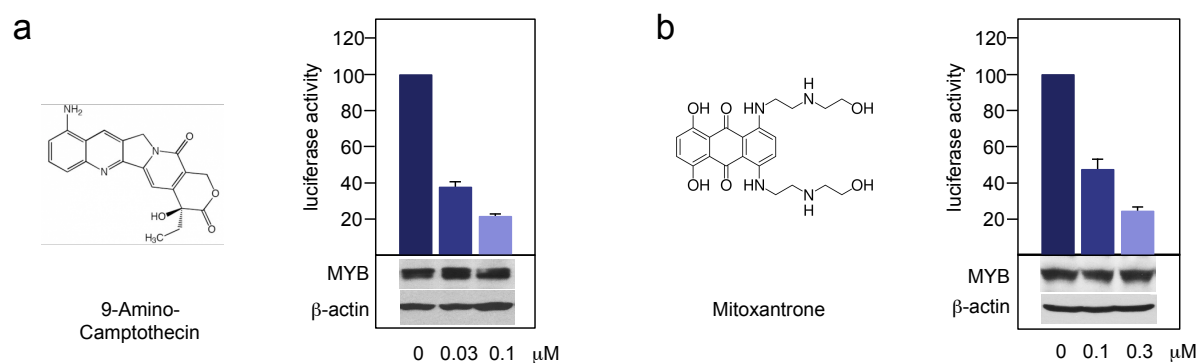

**Supplementary Fig. 2.** Inhibition of MYB activity by 9-amino-camptothecin and mitoxantrone. The chemical structures of 9-amino-camptothecin (**a**) and mitoxantrone (**b**) are shown on the left side. The luciferase activity of Hek-Myb-Luc cells after treatment for 12 hours with the respective compounds are shown on the right. The bottom panels show the expression of MYB and  $\beta$ -actin. Columns and standard deviations for luciferase activity are based on three independent experiments with two replicate samples in each case.

## Original western blots

A novel cell-based screening assay for small-molecule MYB inhibitors identifies podophyllotoxins teniposide and etoposide as inhibitors of MYB activity

Maria Yusenko, Anke Jakobs and Karl-Heinz Klempnauer

## Original western blots for Fig.1b

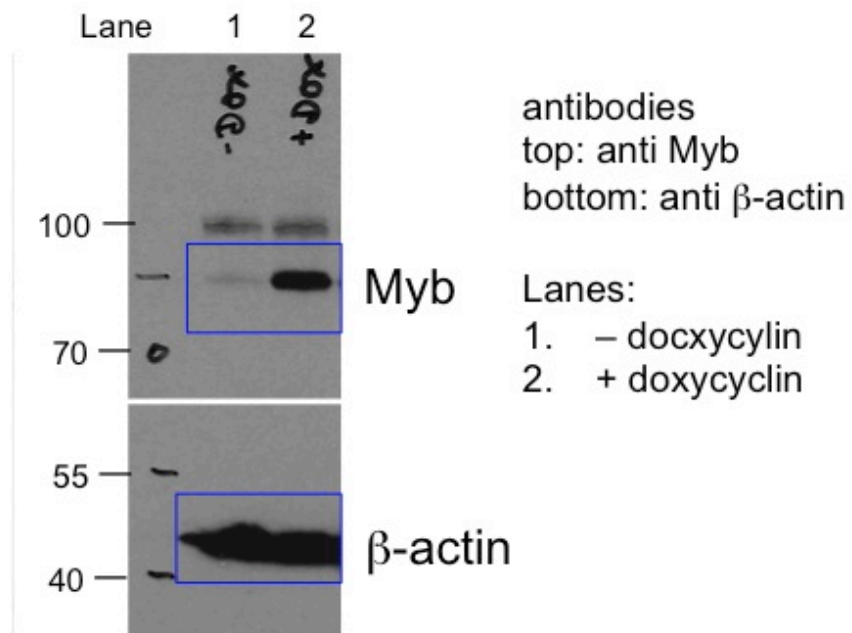



## Original western blots for Fig.1c

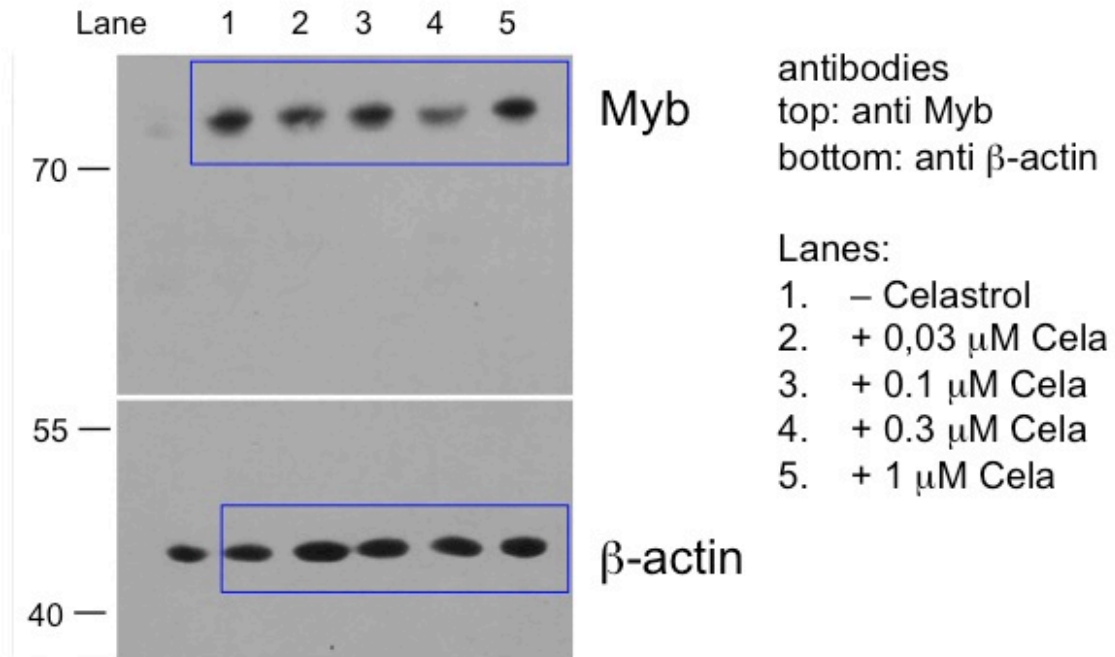

Original western blots for Fig.3b  
(teniposide)

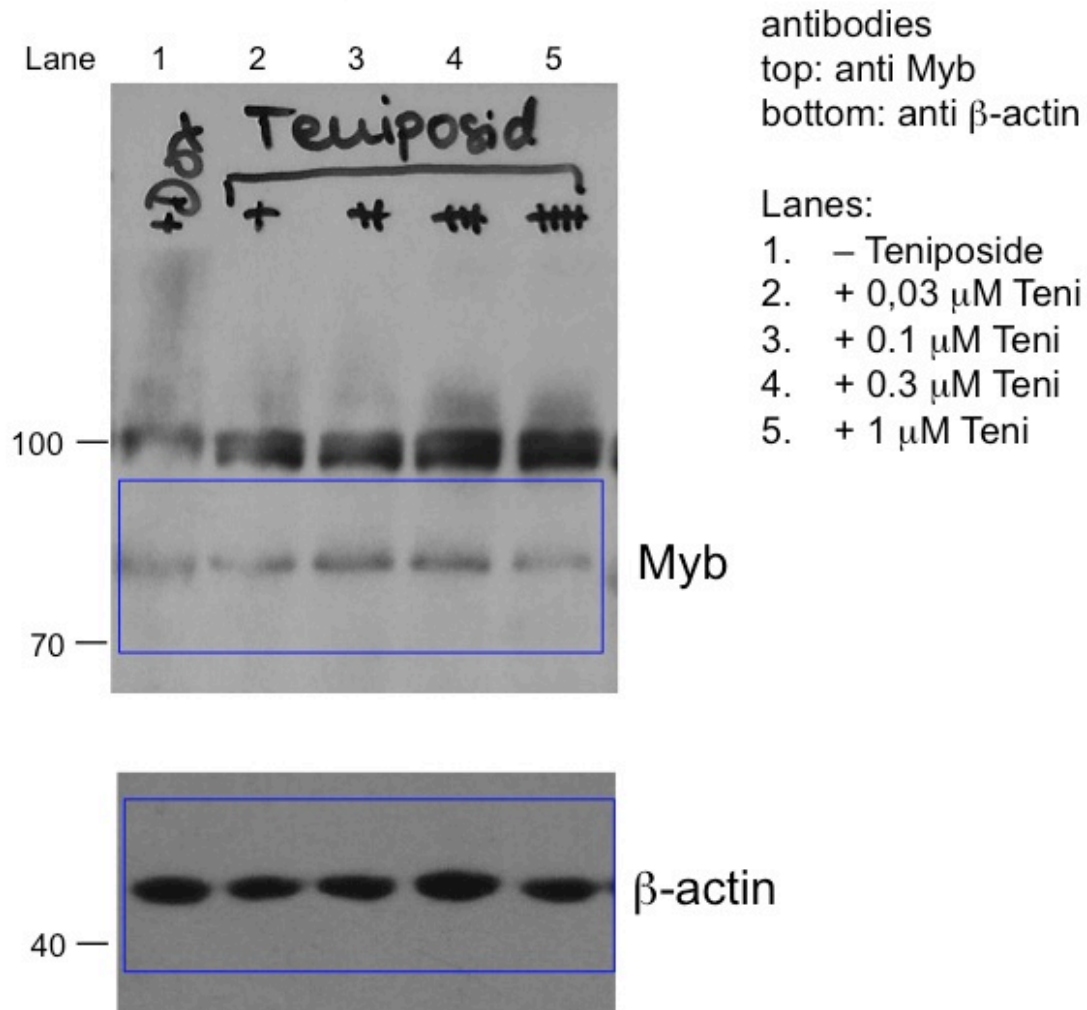

# Original western blots for Fig.3b (toyocamycin)

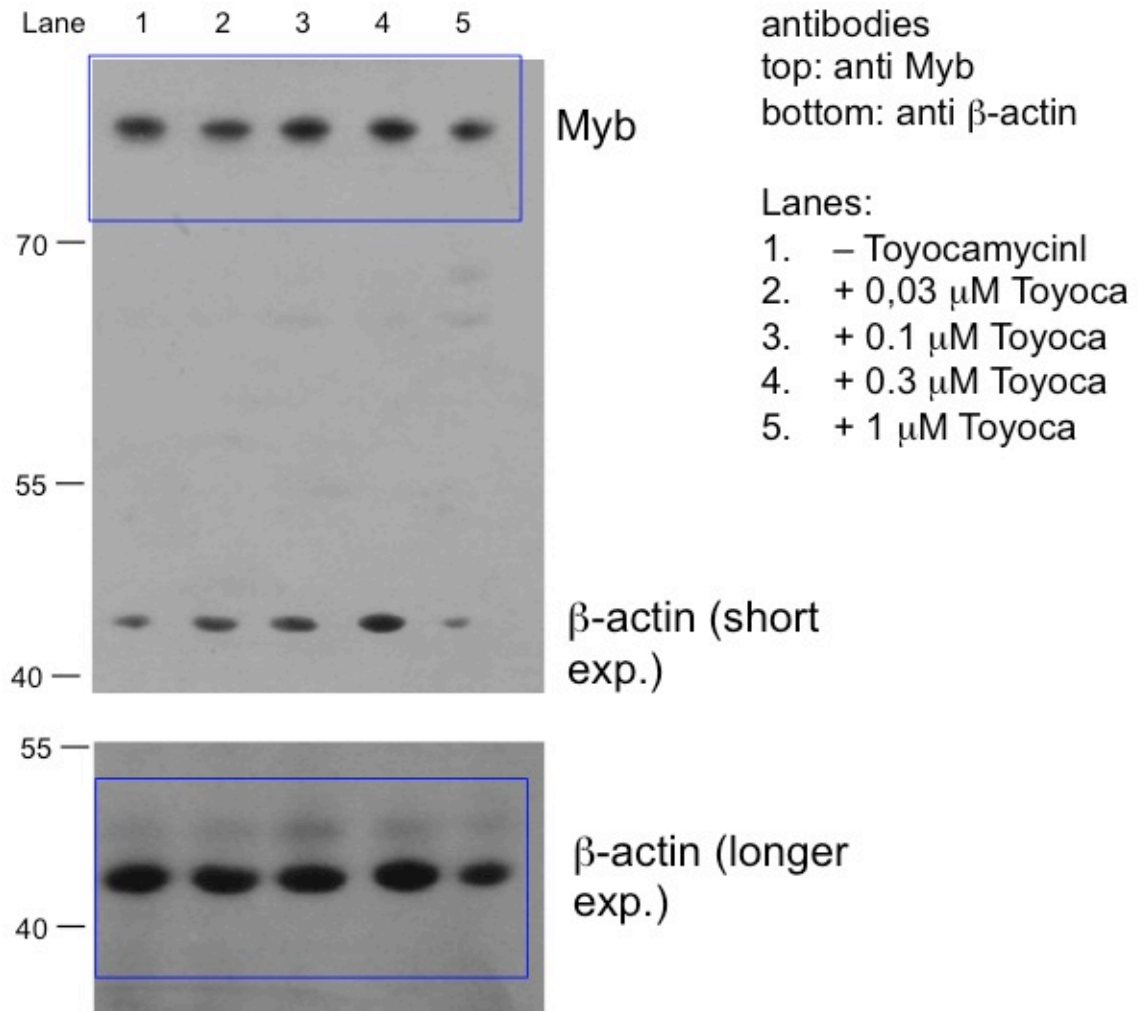

# Original western blots for Fig.4d

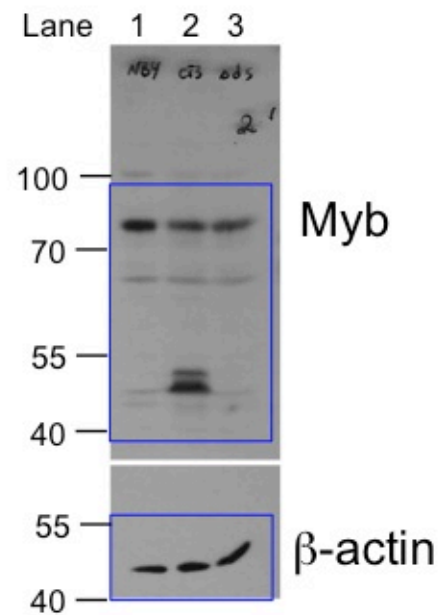

antibodies  
top: anti Myb  
bottom: anti  $\beta$ -actin

Lanes:  
1. NB4 cells  
2. NB4MYB $\Delta$ 3 cells  
3. NB4 control cells

## Original western blots for Fig.4e

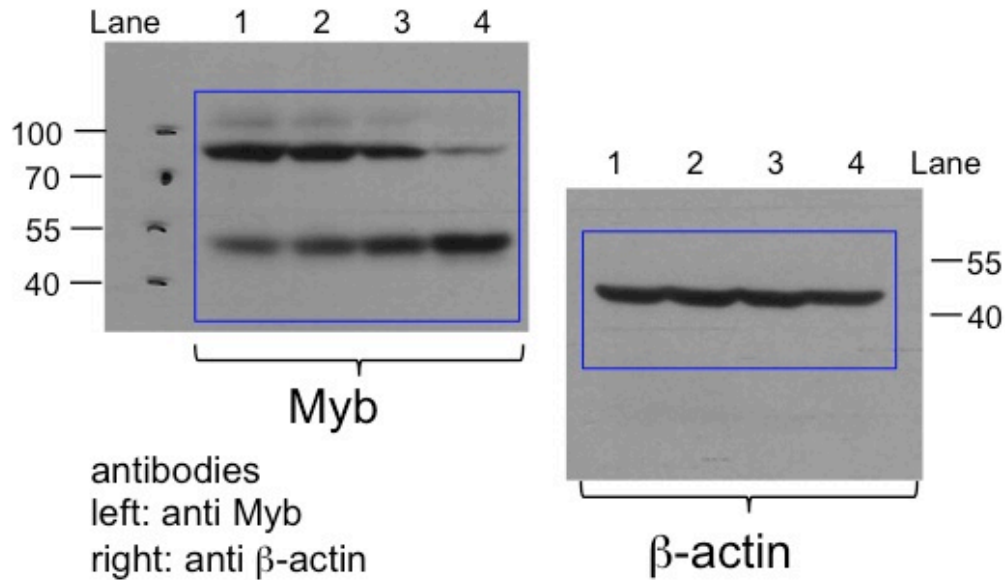

Lanes:

1. - Teniposide
2. + 30 nM Teniposide
3. + 100 nM Teniposide
4. + 300 nM Teniposide

Original western blots for Fig.5a  
(HL60)

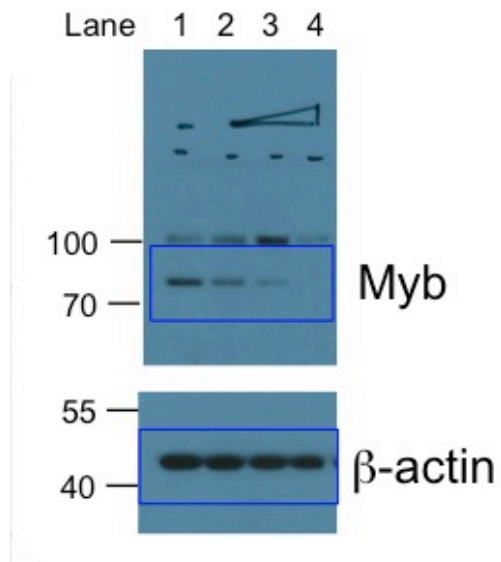

antibodies  
top: anti Myb  
bottom: anti β-actin

Lanes:  
1. - Teniposide  
2. + 0,03 μM Teni  
3. + 0.1 μM Teni  
4. + 0.3 μM Teni

Original western blots for Fig.5a  
(NB4)

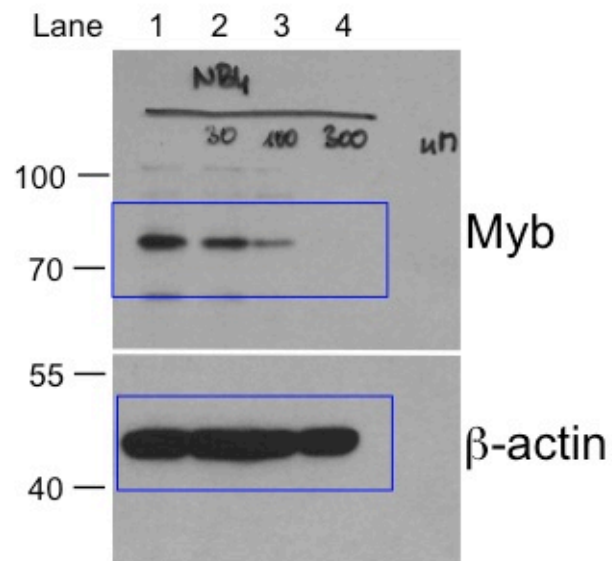

antibodies  
top: anti Myb  
bottom: anti β-actin

Lanes:

1. - Teniposide
2. + 0,03 μM Teni
3. + 0.1 μM Teni
4. + 0.3 μM Teni

# Original western blots for Fig.5a (U937)

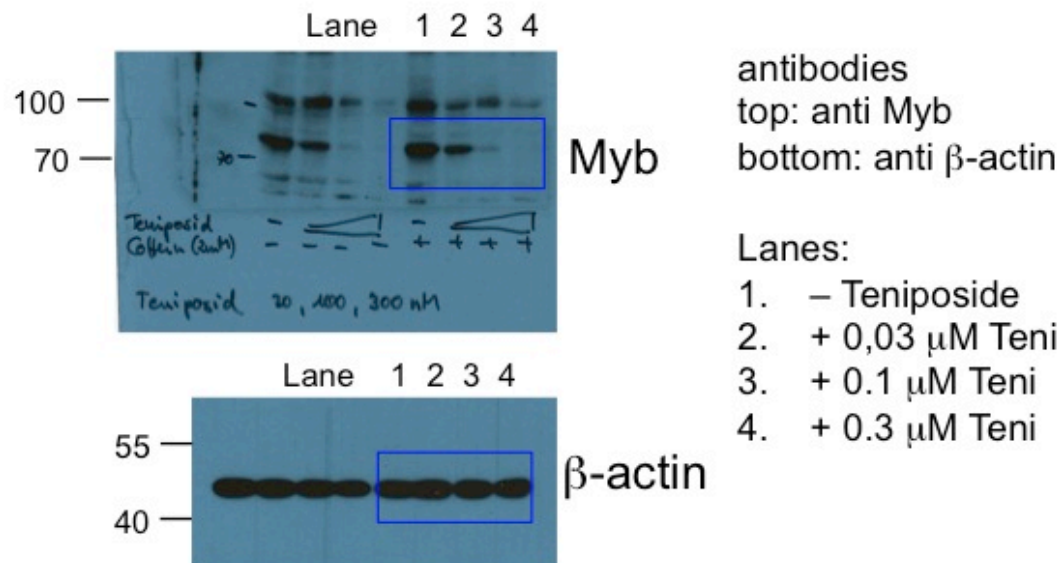



## Original northern blots for Fig.5b

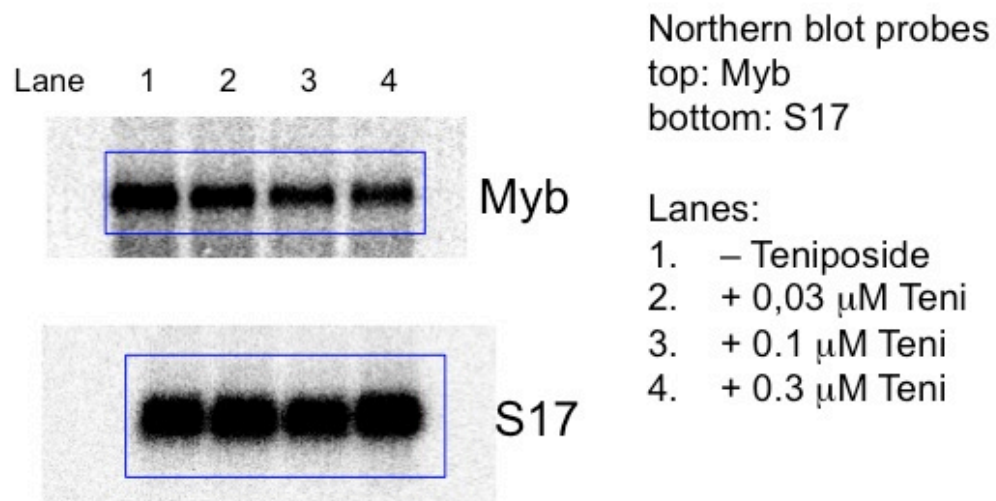

## Original western blots for Fig.5c

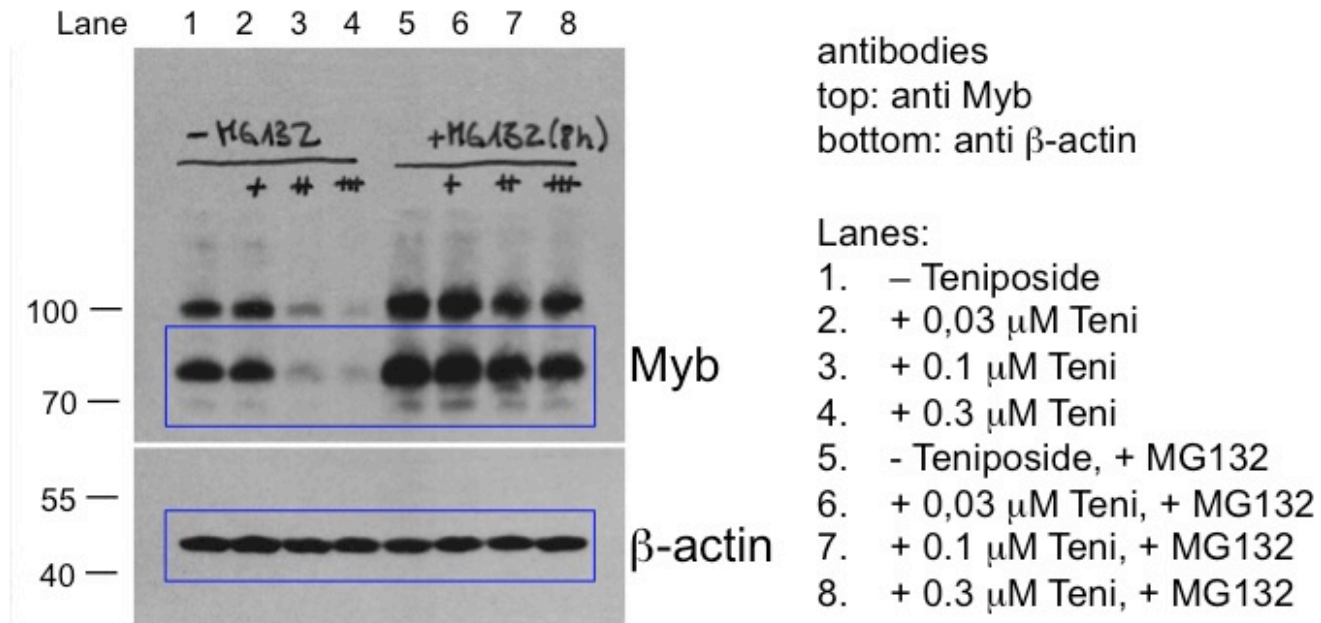

## Original northern blots for Fig.5d

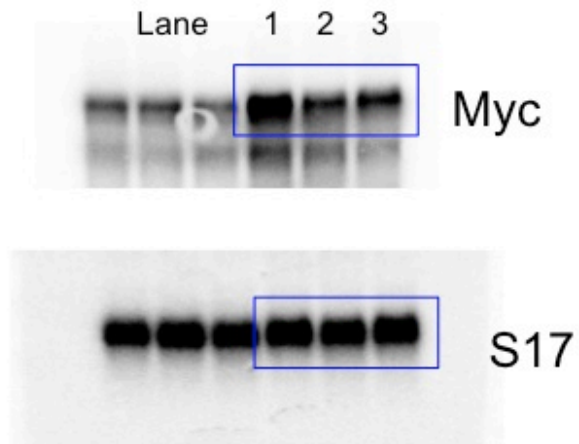

Northern blot probes  
top: Myc  
bottom: S17

Lanes:

1. – Teniposide
2. + 0,03  $\mu\text{M}$  Teni
3. + 0.1  $\mu\text{M}$  Teni
4. + 0.3  $\mu\text{M}$  Teni

## Original western blots for Fig.5d

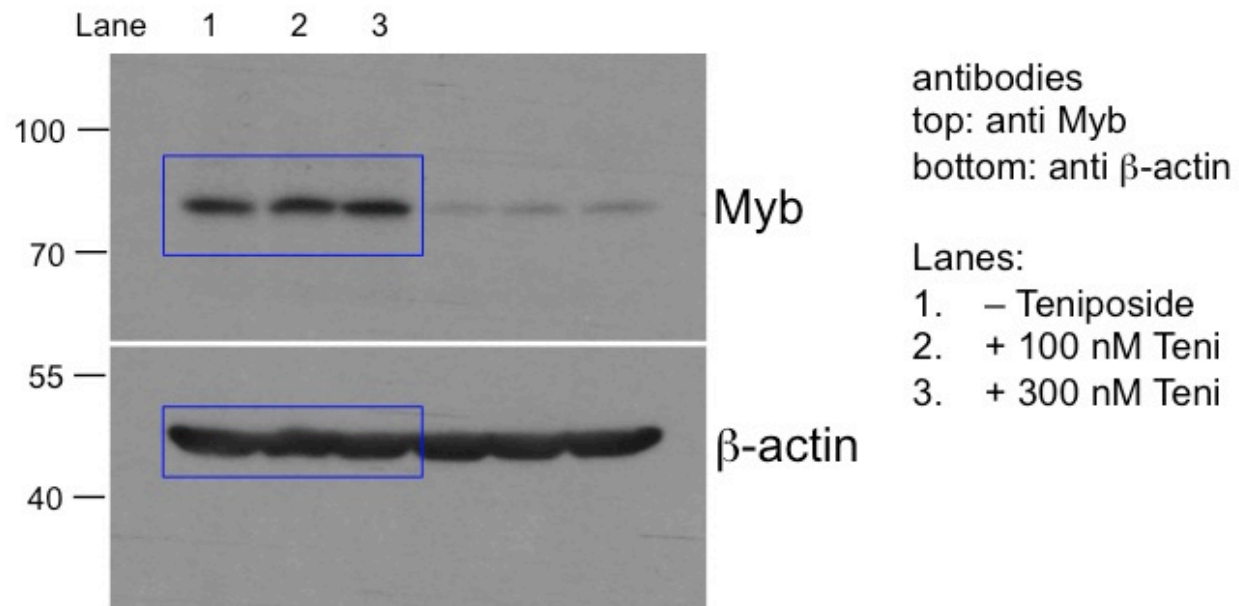

## Original western blots for Fig. 5f

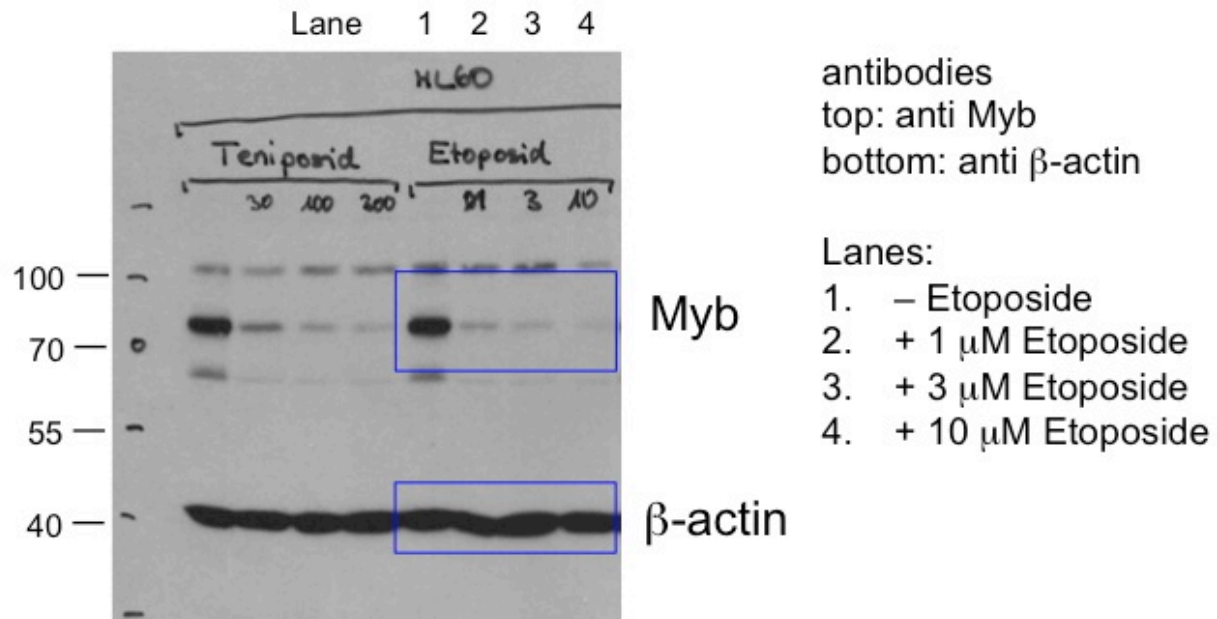

## Original western blots for Fig.6b

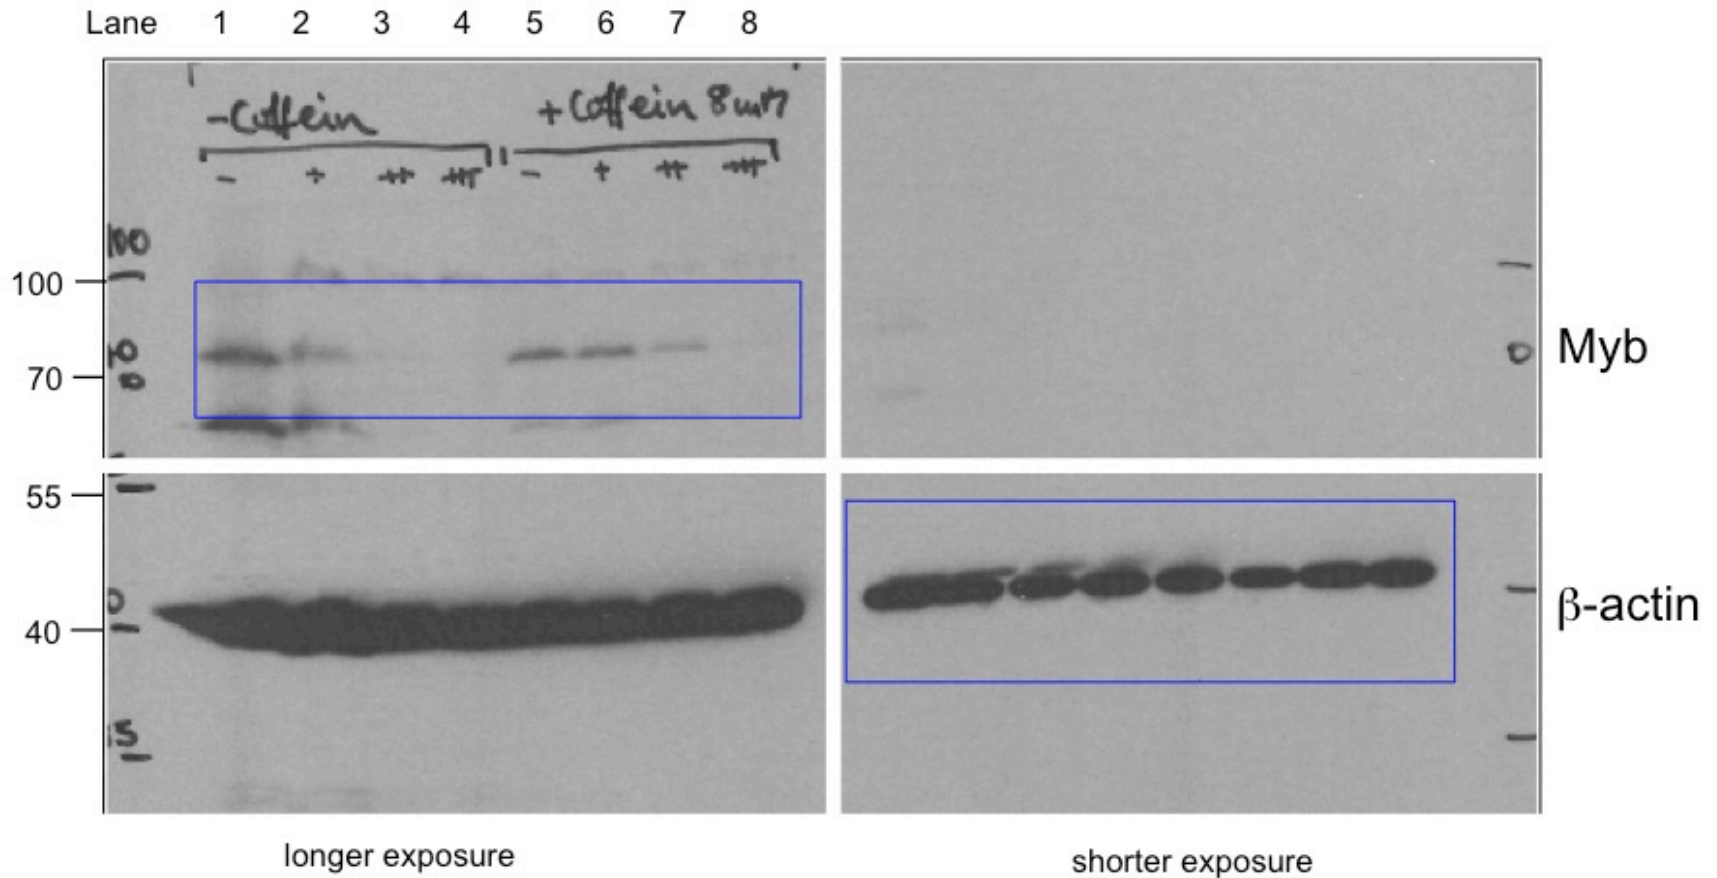

antibodies  
top: anti Myb  
bottom: anti  $\beta$ -actin

Lanes:

- |                  |                              |
|------------------|------------------------------|
| 1. - Teniposide  | 5. - Teniposide              |
| 2. + 30 nM Teni  | 6. + 30 nM Teni, + caffeine  |
| 3. + 100 nM Teni | 7. + 100 nM Teni, + caffeine |
| 4. + 300 nM Teni | 8. + 300 nM Teni, + caffeine |

Original western blots for Fig.6c  
(Myb and  $\beta$ -actin)

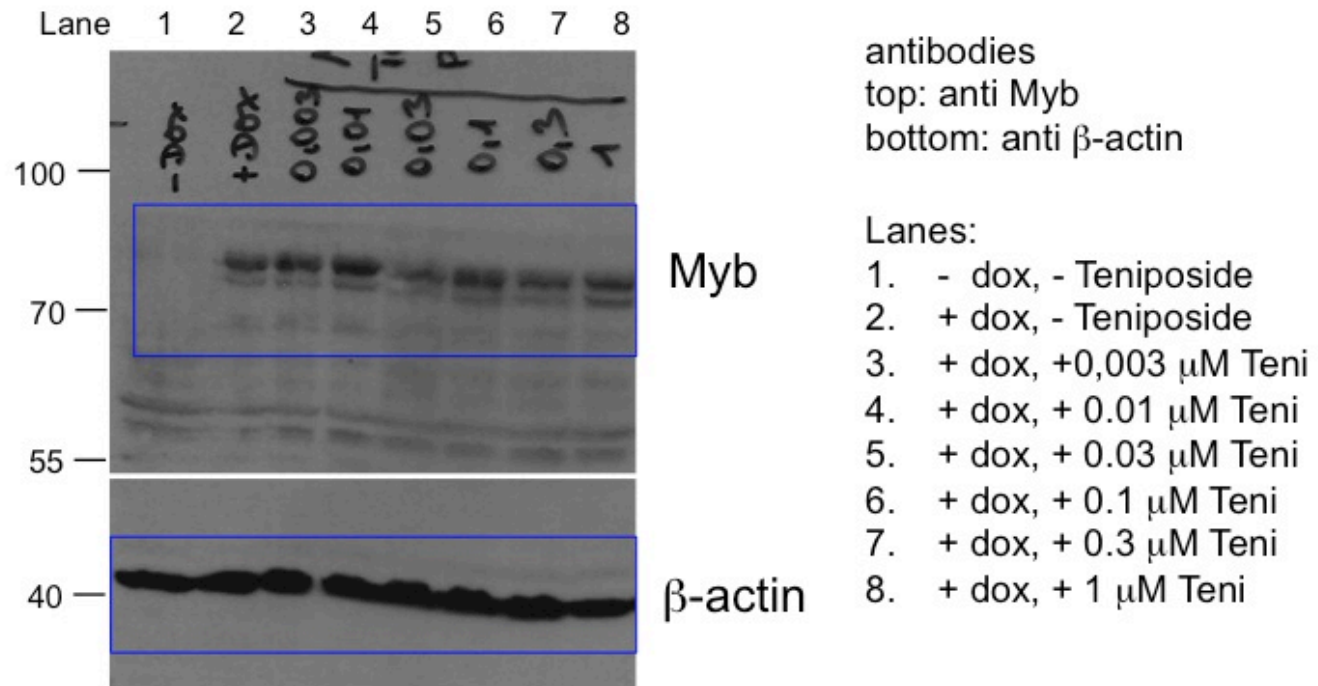

Original western blots for Fig.6c  
( $\gamma$ -H2AX)

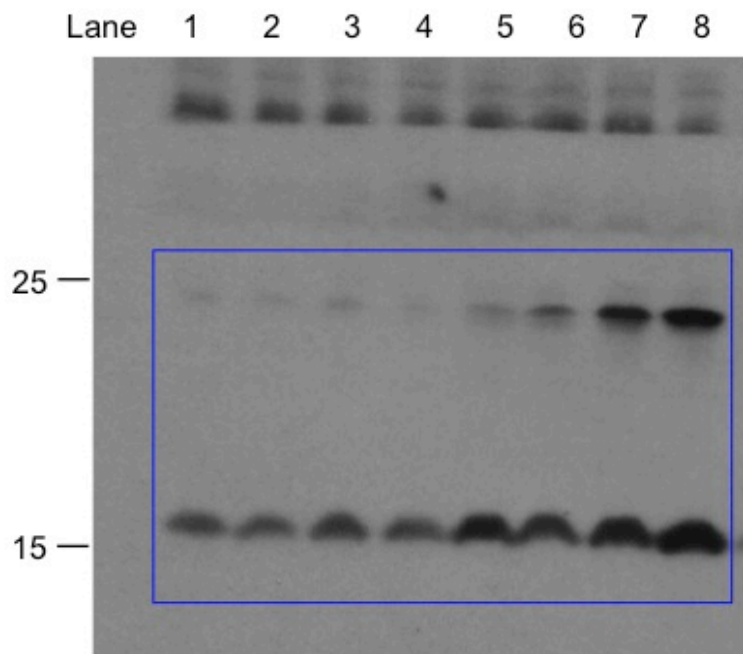

antibodies  
Anti  $\gamma$ -H2Ax

Lanes:

1. - dox, - Teniposide
2. + dox, - Teniposide
3. + dox, + 0,003  $\mu$ M Teni
4. + dox, + 0.01  $\mu$ M Teni
5. + dox, + 0.03  $\mu$ M Teni
6. + dox, + 0.1  $\mu$ M Teni
7. + dox, + 0.3  $\mu$ M Teni
8. + dox, + 1  $\mu$ M Teni



Original western blots for Fig.6c  
(p53)

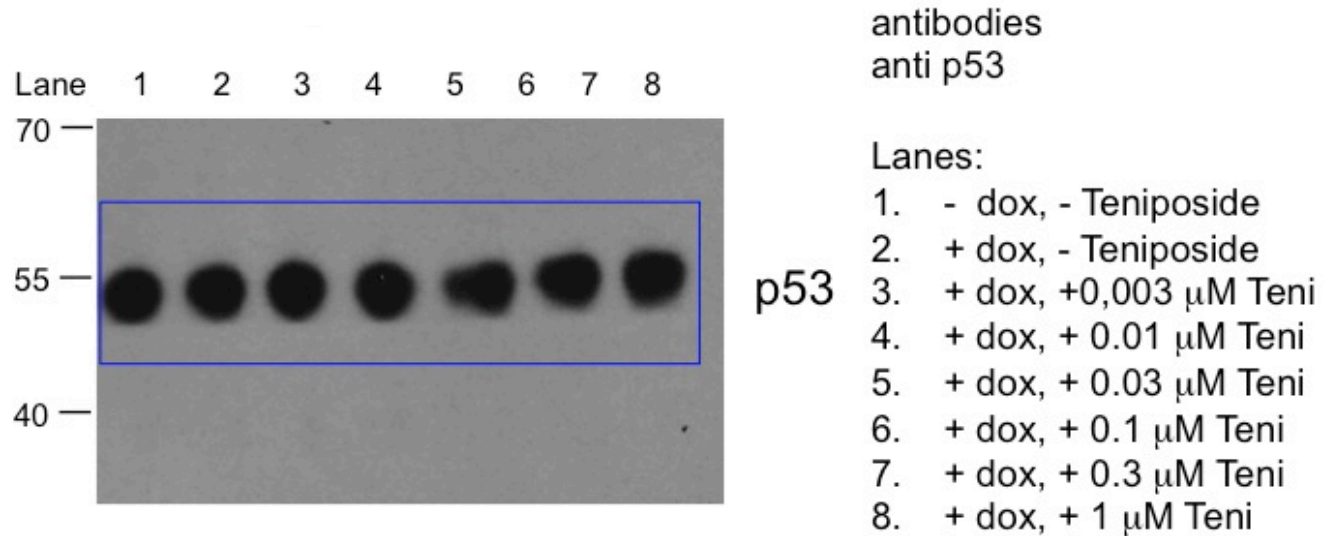

## Original western blots for Fig. 6d

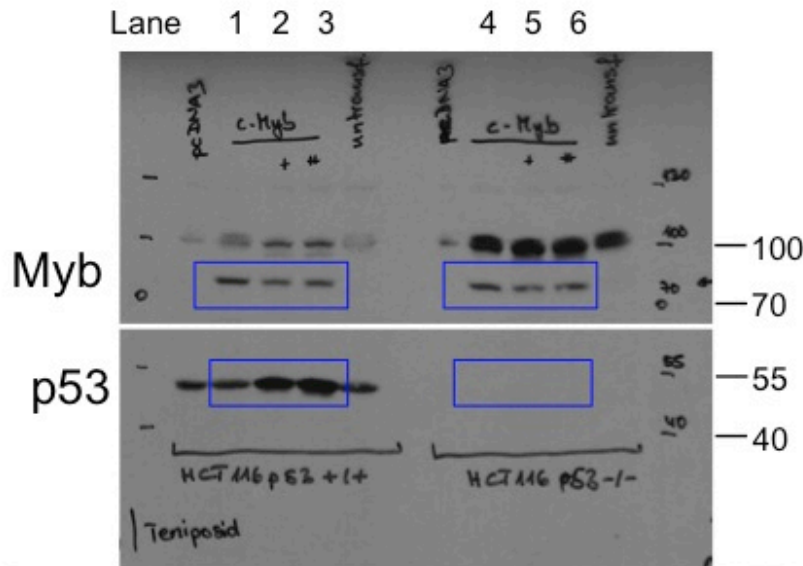

antibodies  
top: anti Myb  
bottom: anti p53

Lanes:

1. - Teniposide, HCT116 wt
2. + 1  $\mu$ M Teni, HCT116 wt
3. + 3  $\mu$ M Teni, HCT116 wt
4. - Teniposide, p53 knock-out
5. + 1  $\mu$ M Teni, p53 knock-out
6. + 3  $\mu$ M Teni, p53 knock-out

# Original western blots for supplementary Fig.1 (Myb)

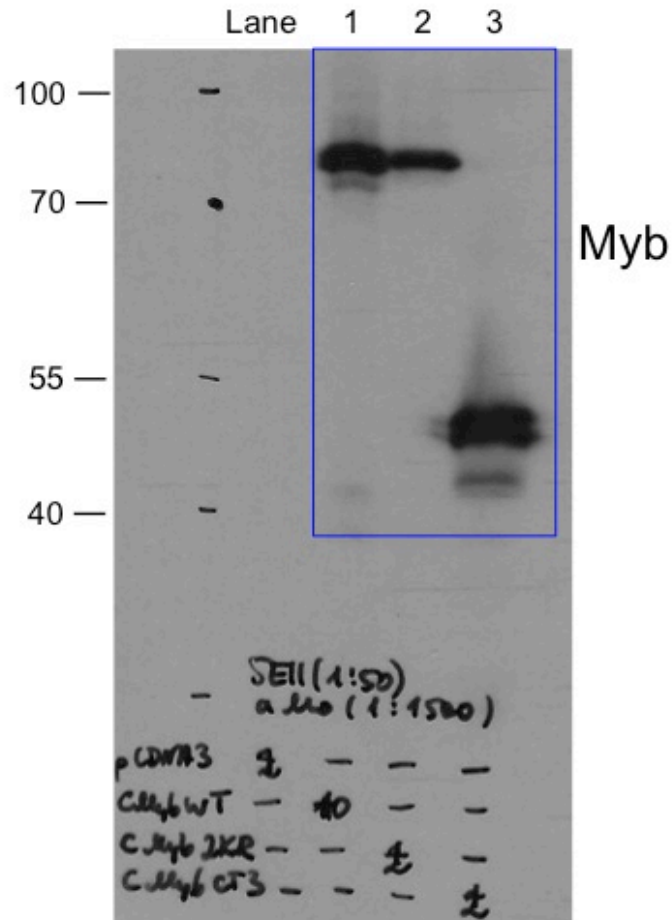

Antibodies:  
anti Myb

Lanes:  
1. Myb-wt cells  
2. Myb-2KR cells  
3. Myb-Δ3 cells

Original western blots for supplementary Fig.1  
( $\beta$ -actin)

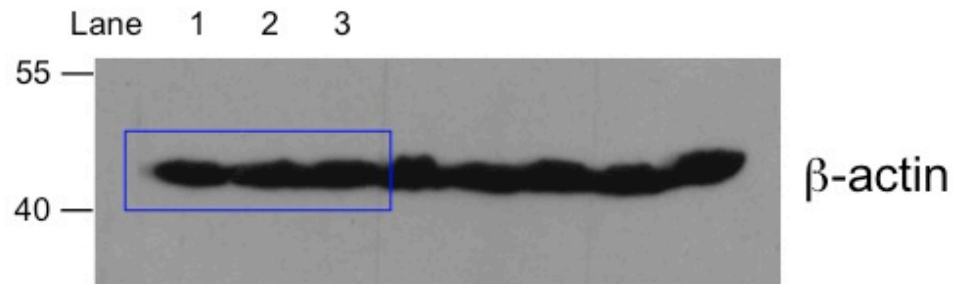

Antibodies:  
anti  $\beta$ -actin

Lanes:  
1. Myb-wt cells  
2. Myb-2KR cells  
3. Myb- $\Delta$ 3 cells

## Original western blots for supplementary Fig.2

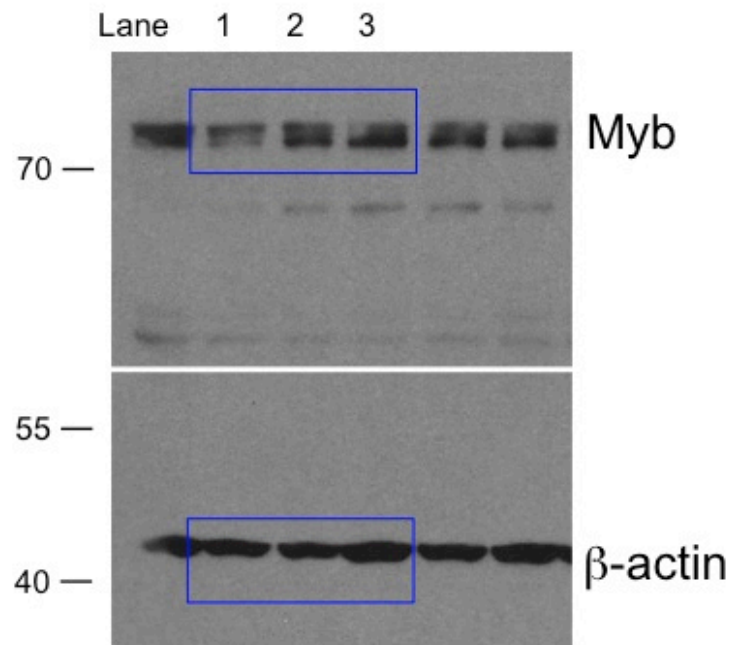

Antibodies:  
top: anti Myb  
bottom: anti  $\beta$ -actin

Lanes:

1. - Camptothecin
2. + 0.03  $\mu$ M Camptothecin
3. + 0.1  $\mu$ M Camptothecin

## Original western blots for supplementary Fig.2b

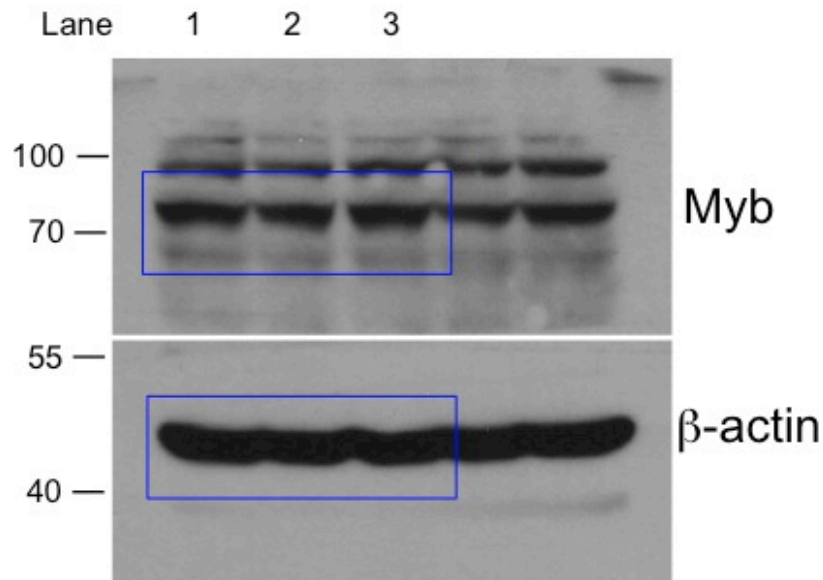

Antibodies:  
top: anti Myb  
bottom: anti  $\beta$ -actin

Lanes:

1. - Mitoxantrone
2. + 0.1  $\mu$ M Mitoxantrone
3. + 0.3  $\mu$ M Mitoxantrone
